# Supplementary material for: Simultaneous Determination of Six Active Components in Danggui Kushen Pills via Quantitative Analysis of Multicomponents by Single Marker
Source: Hindawi journal article supplement (doi:10.1155/2019/9620571), 2019-01-23
Supplement: f1 [file 9620571.f1.pdf]

TABLE. 1 was the detailed results of recovery tests for six tested constituents of proposed QAMS method.

TABLE. 1 Results of recovery tests of various constituents(n=6)

| Constituent  | Known<br>content / $\mu\text{g}$ | Added<br>amount/ $\mu\text{g}$ | Total measured<br>amount/ $\mu\text{g}$ | Recovery<br>rate(%) | Average<br>recovery(%) | RSD<br>(%) |
|--------------|----------------------------------|--------------------------------|-----------------------------------------|---------------------|------------------------|------------|
| matrine      | 2938.4                           | 3120                           | 6061.7                                  | 100.11              | 100.60                 | 1.37       |
|              | 3131.9                           | 3120                           | 6248.4                                  | 99.89               |                        |            |
|              | 3109.2                           | 3120                           | 6301.4                                  | 102.31              |                        |            |
|              | 2887.8                           | 3120                           | 6010.1                                  | 100.07              |                        |            |
|              | 3201.6                           | 3120                           | 6392.4                                  | 102.27              |                        |            |
|              | 3117.8                           | 3120                           | 6205.4                                  | 98.96               |                        |            |
| oxymatrine   | 29281.7                          | 30064                          | 60152.7                                 | 102.68              | 101.58                 | 1.69       |
|              | 28889.9                          | 30064                          | 58612.6                                 | 98.86               |                        |            |
|              | 28673.4                          | 30064                          | 59318.3                                 | 101.93              |                        |            |
|              | 30258.1                          | 30064                          | 61494                                   | 103.90              |                        |            |
|              | 28761.5                          | 30064                          | 59133.6                                 | 101.02              |                        |            |
|              | 28652.8                          | 30064                          | 59034.7                                 | 101.06              |                        |            |
| catechins    | 7.3                              | 7.5                            | 14.9                                    | 101.33              | 99.33                  | 1.64       |
|              | 7.3                              | 7.5                            | 14.7                                    | 98.67               |                        |            |
|              | 7.5                              | 7.5                            | 15.1                                    | 101.33              |                        |            |
|              | 7.4                              | 7.5                            | 14.8                                    | 98.67               |                        |            |
|              | 7.4                              | 7.5                            | 14.7                                    | 97.33               |                        |            |
|              | 7.5                              | 7.5                            | 14.9                                    | 98.67               |                        |            |
| gallic acid  | 110.8                            | 105.4                          | 217.8                                   | 101.52              | 98.47                  | 1.78       |
|              | 106.3                            | 105.4                          | 209.4                                   | 97.82               |                        |            |
|              | 117.4                            | 105.4                          | 220.5                                   | 97.82               |                        |            |
|              | 113.7                            | 105.4                          | 215.7                                   | 96.77               |                        |            |
|              | 109.5                            | 105.4                          | 214.4                                   | 99.53               |                        |            |
|              | 106.6                            | 105.4                          | 209.2                                   | 97.34               |                        |            |
| rutin        | 38.6                             | 40.3                           | 78.6                                    | 99.26               | 100.25                 | 1.87       |
|              | 39.1                             | 40.3                           | 80.4                                    | 102.48              |                        |            |
|              | 40.3                             | 40.3                           | 79.9                                    | 98.26               |                        |            |
|              | 40.1                             | 40.3                           | 80.2                                    | 99.50               |                        |            |
|              | 39.7                             | 40.3                           | 81.1                                    | 102.73              |                        |            |
|              | 40.7                             | 40.3                           | 80.7                                    | 99.26               |                        |            |
| ferulic acid | 1387.4                           | 1322.7                         | 2688.5                                  | 98.37               | 101.04                 | 1.91       |
|              | 1402.7                           | 1322.7                         | 2774.9                                  | 103.74              |                        |            |
|              | 1367.5                           | 1322.7                         | 2702.4                                  | 100.92              |                        |            |
|              | 1357.2                           | 1322.7                         | 2699.1                                  | 101.45              |                        |            |
|              | 1428.5                           | 1322.7                         | 2781.5                                  | 102.29              |                        |            |
|              | 1345.6                           | 1322.7                         | 2661.6                                  | 99.49               |                        |            |

TABLE. 2-4 displayed the detailed results of reproducibility test of the relative correction factors(RCF), including effects of different instrument, chromatographic column, column temperature and flow rate.

TABLE. 2 Effects of different instrument and chromatographic column on RCF

| Instrument       | Chromatographic column            | Relative correction factors |                             |                           |                        |                               |
|------------------|-----------------------------------|-----------------------------|-----------------------------|---------------------------|------------------------|-------------------------------|
|                  |                                   | Gallic acid/<br>matrine     | Gallic acid /<br>oxymatrine | Gallic acid /<br>catechin | Gallic acid /<br>rutin | Gallic acid /<br>ferulic acid |
| Agilent<br>1260  | Agilent                           |                             |                             |                           |                        |                               |
|                  | ZORBAX SB-C <sub>18</sub>         | 3.80                        | 3.01                        | 0.39                      | 2.31                   | 2.36                          |
|                  | Agilent TC-C <sub>18</sub>        | 3.82                        | 3.01                        | 0.40                      | 2.27                   | 2.35                          |
| Shimadzu<br>2030 | Waters X Bridge-C <sub>18</sub>   | 3.81                        | 2.98                        | 0.39                      | 2.29                   | 2.34                          |
|                  | Agilent ZORBAX SB-C <sub>18</sub> | 3.85                        | 2.99                        | 0.40                      | 2.31                   | 2.38                          |
|                  | Agilent TC-C <sub>18</sub>        | 3.79                        | 3.07                        | 0.38                      | 2.35                   | 2.27                          |
|                  | Waters X Bridge-C <sub>18</sub>   | 3.73                        | 3.03                        | 0.39                      | 2.25                   | 2.33                          |
|                  | Mean                              | 3.80                        | 3.02                        | 0.39                      | 2.30                   | 2.34                          |
|                  | RSD(%)                            | 1.05                        | 1.06                        | 1.92                      | 1.52                   | 1.61                          |

TABLE. 3 Effects of different column temperature on RCF

| Column temperature | Relative correction factors |                             |                           |                        |                               |
|--------------------|-----------------------------|-----------------------------|---------------------------|------------------------|-------------------------------|
|                    | Gallic acid/<br>matrine     | Gallic acid /<br>oxymatrine | Gallic acid /<br>catechin | Gallic acid /<br>rutin | Gallic acid /<br>ferulic acid |
| 25℃                | 3.78                        | 3.03                        | 0.39                      | 2.33                   | 2.40                          |
| 30℃                | 3.81                        | 2.96                        | 0.39                      | 2.32                   | 2.37                          |
| 35℃                | 3.65                        | 3.01                        | 0.38                      | 2.28                   | 2.42                          |
| Mean               | 3.75                        | 3.00                        | 0.39                      | 2.31                   | 2.40                          |
| RSD(%)             | 2.27                        | 1.20                        | 1.49                      | 1.15                   | 1.05                          |

TABLE. 4 Effects of different flow rate on RCF

| flow rate<br>(mL • min <sup>-1</sup> ) | relative correction factors |                             |                           |                        |                               |
|----------------------------------------|-----------------------------|-----------------------------|---------------------------|------------------------|-------------------------------|
|                                        | Gallic acid/<br>matrine     | Gallic acid /<br>oxymatrine | Gallic acid /<br>catechin | Gallic acid /<br>rutin | Gallic acid /<br>ferulic acid |
| 0.8                                    | 3.82                        | 3.07                        | 0.40                      | 2.31                   | 2.38                          |
| 1.0                                    | 3.79                        | 2.99                        | 0.41                      | 2.34                   | 2.41                          |
| 1.2                                    | 3.73                        | 3.02                        | 0.39                      | 2.27                   | 2.33                          |
| Mean                                   | 3.78                        | 3.03                        | 0.40                      | 2.31                   | 2.37                          |
| RSD(%)                                 | 1.21                        | 1.34                        | 2.50                      | 1.52                   | 1.70                          |

TABLE. 5 showed the effects of different instrument and chromatographic column on relative retention time( $t_R$ ) and retention time difference( $\Delta t$ ) of six tested components.

TABLE. 5 Results of  $t_R$  and  $\Delta t$  of tested components

| Instrument      | Column                               | Matrine |            | Oxymatrine |            | Catechin |            | Rutin |            | Ferulic acid |            |
|-----------------|--------------------------------------|---------|------------|------------|------------|----------|------------|-------|------------|--------------|------------|
|                 |                                      | $t_R$   | $\Delta t$ | $t_R$      | $\Delta t$ | $t_R$    | $\Delta t$ | $t_R$ | $\Delta t$ | $t_R$        | $\Delta t$ |
| Agilent<br>1260 | Agilent ZORBAX<br>SB-C <sub>18</sub> | 0.91    | 0.479      | 1.707      | 3.760      | 3.200    | 11.702     | 9.198 | 42.344     | 8.154        | 38.460     |
|                 | Agilent TC-C <sub>18</sub>           | 0.895   | 0.531      | 1.671      | 3.937      | 3.085    | 11.873     | 9.224 | 44.594     | 8.009        | 36.794     |
|                 | Waters X Bridge-C <sub>18</sub>      | 0.897   | 0.542      | 1.702      | 3.885      | 3.190    | 11.795     | 9.118 | 43.658     | 8.145        | 38.880     |
| Shimadu<br>2030 | Agilent ZORBAX<br>SB-C <sub>18</sub> | 0.913   | 0.484      | 1.702      | 3.781      | 3.202    | 12.064     | 9.153 | 42.417     | 8.155        | 38.481     |
|                 | Agilent TC-C <sub>18</sub>           | 0.892   | 0.538      | 1.675      | 3.952      | 3.107    | 12.271     | 9.211 | 44.672     | 8.109        | 36.802     |
|                 | Waters X Bridge-C <sub>18</sub>      | 0.881   | 0.553      | 1.692      | 3.879      | 3.191    | 12.316     | 9.12  | 43.701     | 8.145        | 38.847     |
|                 | Mean                                 | 0.898   | 0.521      | 1.692      | 3.866      | 3.163    | 12.004     | 9.171 | 43.564     | 8.120        | 38.044     |
|                 | RSD(%)                               | 1.32    | 6.06       | 0.90       | 2.05       | 1.65     | 2.12       | 0.51  | 2.32       | 0.70         | 2.58       |
